# Supplementary material for: Quantifying cascading impacts through road network analysis in an insular volcanic setting: the 2021 Tajogaite eruption of La Palma Island (Spain)
Source: Copernicus journal article supplement (doi:10.5194/nhess-25-4815-2025), 2025-12-04
Supplement: Supplementary file [file nhess-25-4815-2025-supplement-title-page.pdf › nhess-25-4815-2025-supplement-title-page.pdf]

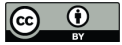

*Supplement of*

## **Quantifying cascading impacts through road network analysis in an insular volcanic setting: the 2021 Tajogaite eruption of La Palma Island (Spain)**

**Lucia Dominguez et al.**

*Correspondence to:* Lucia Dominguez ([lucia.dominguez@unige.ch](mailto:lucia.dominguez@unige.ch))

- [nhess-25-4815-2025-supplement-title-page.pdf](#)
- [Dominguez\\_et al\\_Supplementary\\_review](#)
  - [AnimationS1\\_lava\\_tephra\\_LowSpeed\\_ECC.gif](#)
  - [AnimationS2\\_lava\\_tephra\\_LowSpeed\\_ECC\\_route3.gif](#)
  - [Supplementary\\_review.pdf](#)

The copyright of individual parts of the supplement might differ from the article licence.
